# Supplementary material for: Human serum triggers antibiotic tolerance in Staphylococcus aureus
Source: PubMed Central journal article supplement (PMC9018823; doi:10.1038/s41467-022-29717-3), 2022-04-19
Supplement: 41467_2022_29717_MOESM1_ESM.pdf [file 41467_2022_29717_MOESM1_ESM.pdf]

1  
2  
3  
4  
5  
6  
7  
8  
9  
10  
11  
12  
13  
14  
15  
16  
17  
18  
19  
20  
21  
22  
23  
24  
25  
26  
27  
28  
29  
30  
31

**Human serum triggers antibiotic tolerance in *Staphylococcus aureus***

Elizabeth V. K. Ledger<sup>1</sup>, Stéphane Mesnage<sup>2</sup> and Andrew M. Edwards<sup>1\*</sup>

**Supplementary information**

**Supplementary Figures 1-15**

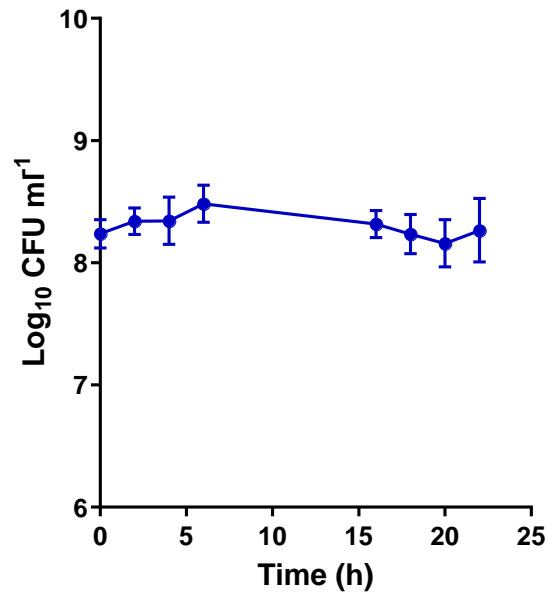

32

33

34 **Supplementary Fig. 1. *S. aureus* CFU counts do not change during incubation in human serum.** Log<sub>10</sub>  
35 CFU ml<sup>-1</sup> during incubation of TSB-grown *S. aureus* in human serum for 22 h. Graph represents the  
36 geometric mean ± geometric standard deviation of three independent experiments. Data were  
37 analysed by one-way ANOVA and no statistically significant differences were observed (log<sub>10</sub> CFU ml<sup>-1</sup>  
38 at time points vs at 0 h). Source data are provided as a Source Data file.

39

40

41

42

43

44

45

46

47

48

49

50

51

52

53

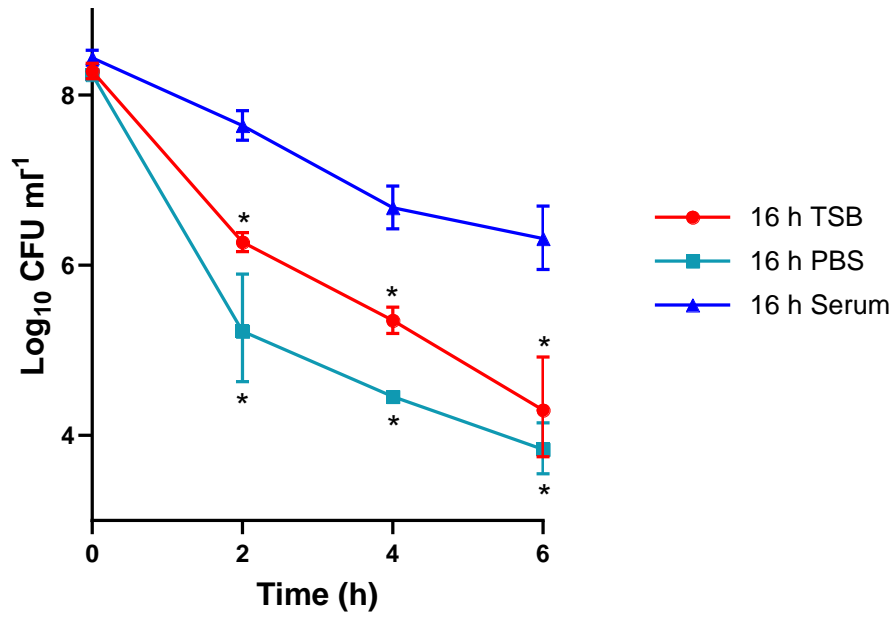

54

55 **Supplementary Fig. 2. Incubation of *S. aureus* in serum but not TSB or PBS for 16 h results in**  
 56 **tolerance towards daptomycin.** TSB-grown *S. aureus* cultures were incubated for 16 h in TSB, PBS or  
 57 serum, adjusted to  $2 \times 10^8$  CFU ml<sup>-1</sup> where necessary and resuspended in fresh serum containing 80  
 58  $\mu\text{g ml}^{-1}$  daptomycin. Log<sub>10</sub> CFU ml<sup>-1</sup> was measured over 6 h. Graph represents the geometric mean  $\pm$   
 59 geometric standard deviation of three independent repeats and data were analysed by two-way  
 60 ANOVA with Tukey's *post-hoc* test (serum-adapted vs PBS/TSB-adapted at each time point). \* P =  
 61 0.0016 (TSB 2 h), 0.0065 (TSB 4 h), 0.022 (TSB 6 h), 0.0292 (PBS 2 h), 0.0075 (PBS 4 h), 0.0023 (PBS 6  
 62 h). Source data are provided as a Source Data file.

63

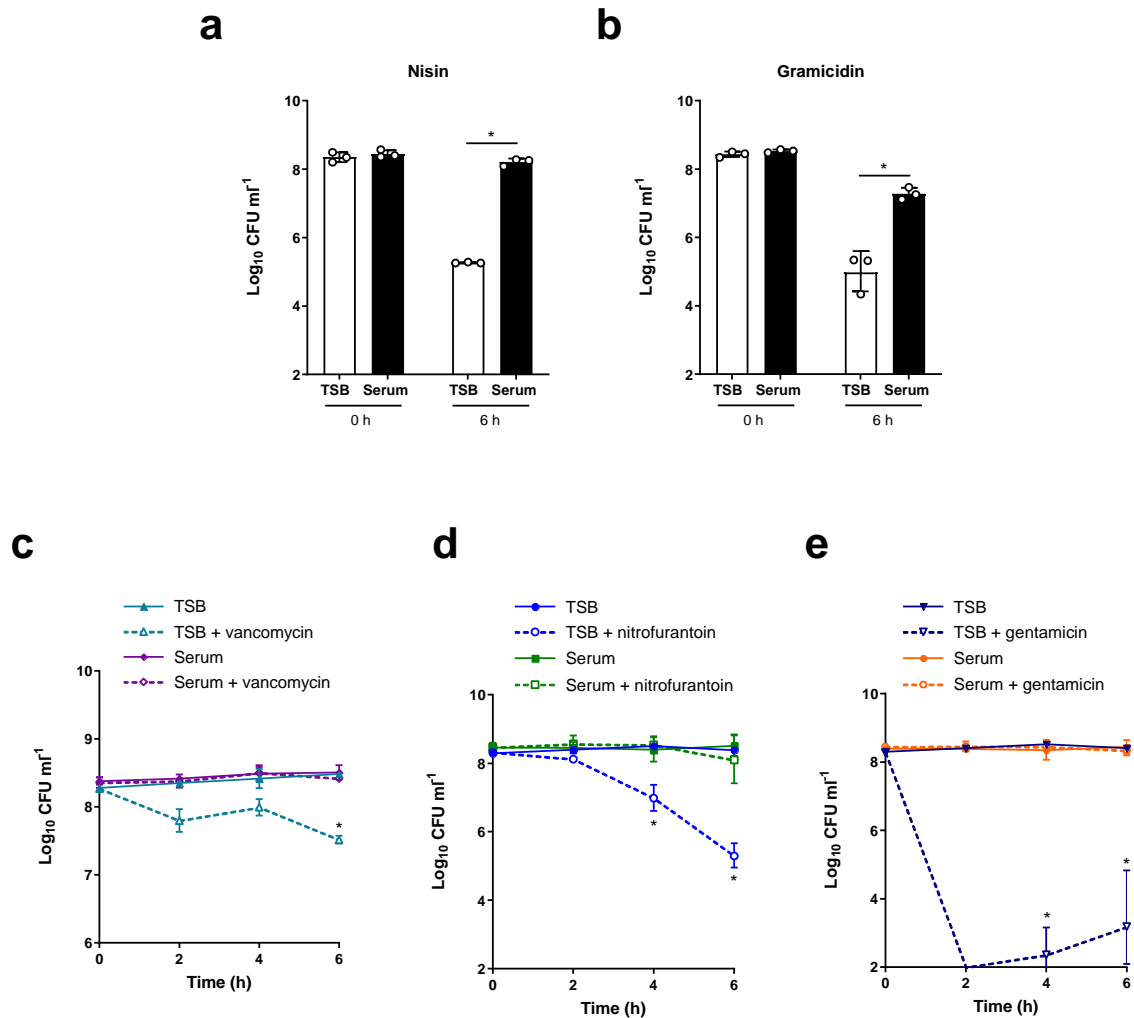

64  
 65 **Supplementary Fig. 3. Incubation of *S. aureus* in serum results in tolerance towards antimicrobials**  
 66 **from various classes.** Log<sub>10</sub> CFU ml<sup>-1</sup> of TSB-grown and serum-adapted cultures of *S. aureus* USA300  
 67 WT after/throughout a 6 h incubation in serum with 128 μg ml<sup>-1</sup> nisin (a), 160 μg ml<sup>-1</sup> gramicidin (b),  
 68 160 μg ml<sup>-1</sup> vancomycin (c), 160 μg ml<sup>-1</sup> nitrofurantoin (d) or 40 μg ml<sup>-1</sup> gentamicin (e). Graphs  
 69 represent the geometric mean ± geometric standard deviation of three (a, b, d, e) or two (c)  
 70 independent replicates. Graphs in a – b were analysed by two-way ANOVA with Sidak's *post-hoc* test  
 71 (\* for a, P < 0.0001. For b, P < 0.0001. Graphs in c – e were analysed by two-way ANOVA with Tukey's  
 72 *post-hoc* test; TSB-grown compared to serum-adapted at each time-point. (\* for c, P = 0.0103. For d,  
 73 P = 0.0197 (4 h), 0.0257 (6 h). For e, P = 0.0122 (4 h), 0.0491 (6h)). In e, some data points fell below  
 74 the limit of detection of 100 CFU ml<sup>-1</sup>. Source data are provided as a Source Data file.

75  
 76  
 77  
 78  
 79  
 80

81

82

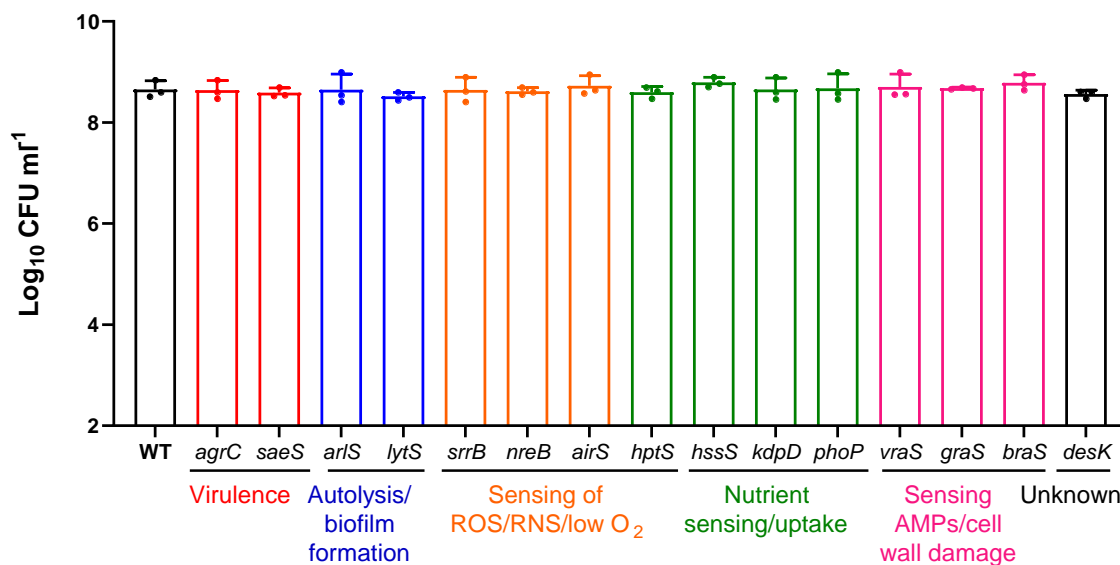

83

84

85 **Supplementary Fig. 4. TCS-deficient mutants survive as well as WT in human serum.** Log<sub>10</sub> CFU ml<sup>-1</sup>  
86 of *S. aureus* JE2 WT and mutants defective for the sensor kinase components of TCS after 16 h  
87 incubation in human serum. Data represent the geometric mean ± geometric standard deviation of  
88 three independent experiments. Data were analysed by one-way ANOVA and no statistically  
89 significant differences were observed demonstrating there were no differences in survival in serum  
90 between the WT and any of the mutants. Source data are provided as a Source Data file.

91

92

93

94

95

96

97

98

99

100

101

102

103

104

105

**a**

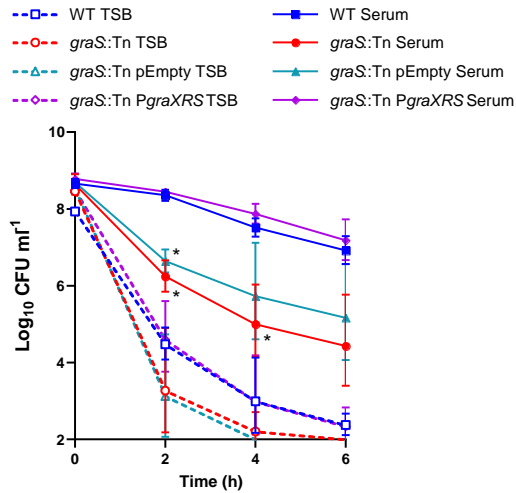

**b**

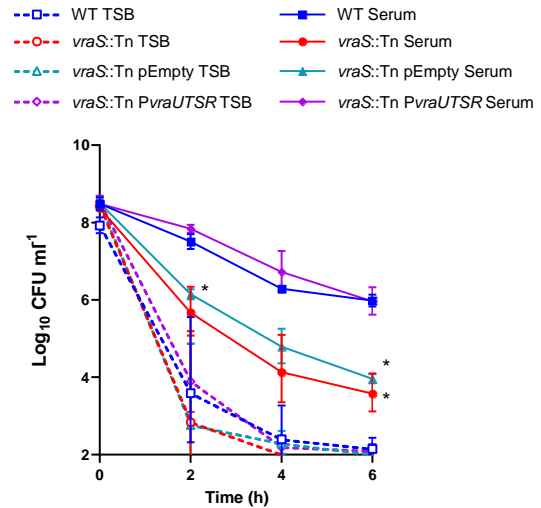

106

107

108 **Supplementary Fig. 5. Complementation of the *vraS::Tn* and *graS::Tn* mutants restores tolerance to**

109 **WT levels.** Log<sub>10</sub> CFU ml<sup>-1</sup> of TSB-grown and serum-adapted cultures of *S. aureus* JE2 WT, *graS::Tn* and

110 *graS::Tn* complemented with pCN34 or P*graXRS* (a) and WT, *vraS::Tn* and *vraS::Tn* complemented with

111 empty pCN34 or P*vraUTSR* (b) over 6 h incubation in serum with 80 μg ml<sup>-1</sup> daptomycin. Graphs

112 represent the geometric mean ± geometric standard deviation of three independent experiments. \*

113 for a, P = 0.0008 (2 h *graS::Tn* pEmpty Serum), 0.0019 (2 h *graS::Tn* Serum), 0.0279 (4 h *graS::Tn*

114 Serum). For b, P = 0.002 (2 h *vraS::Tn* pEmpty Serum), 0.0002 (6 h *vraS::Tn* pEmpty Serum), 0.0198 (6

115 h *vraS::Tn* Serum) determined by two-way ANOVA with Dunnett's *post-hoc* test, serum-adapted WT

116 compared to serum-adapted mutants at each time-point. Some data points fell below the limit of

117 detection of 100 CFU ml<sup>-1</sup>. Source data are provided as a Source Data file.

118

119

120

121

122

123

124

125

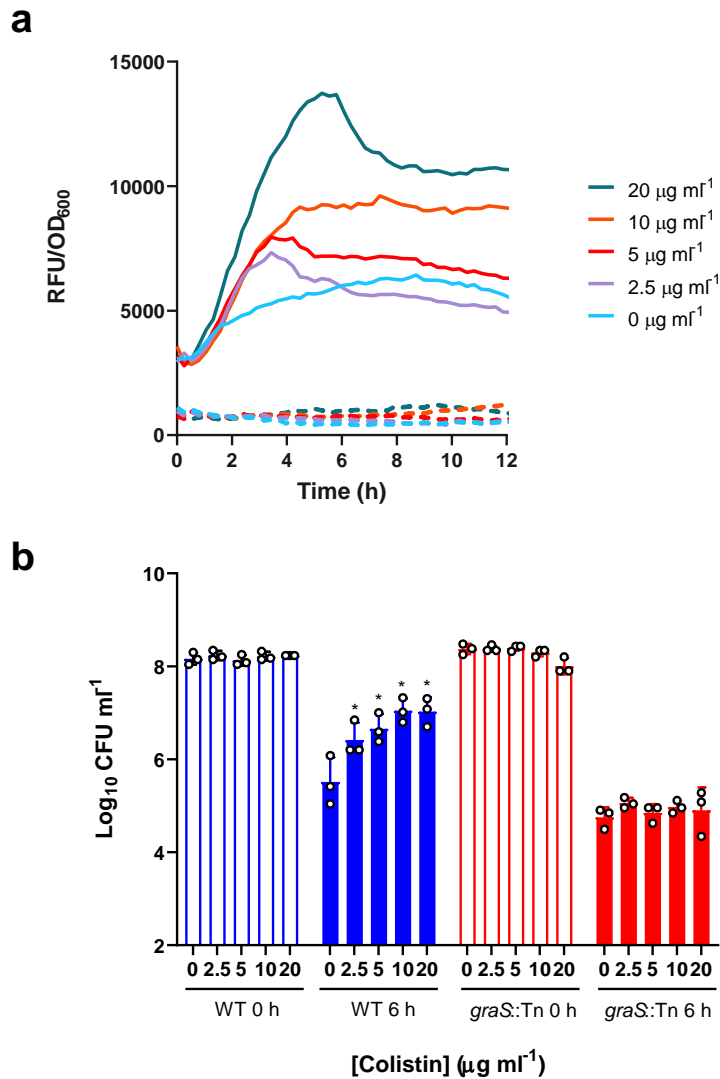

126

127 **Supplementary Fig. 6. Colistin activates GraRS signalling and triggers daptomycin tolerance.** TSB-  
 128 grown cultures of *S. aureus* JE2 WT (solid lines) and the *graS::Tn* mutant (dashed lines) containing  
 129 *PdltA-gfp* were exposed to various concentrations of colistin (2.5 – 20 µg ml<sup>-1</sup>) in RPMI 1640 (a). GFP  
 130 fluorescence (RFU) and OD<sub>600</sub> were measured every 15 min for 12 h. Fluorescence values were divided  
 131 by OD<sub>600</sub> measurements to normalise for changes in cell density. *S. aureus* JE2 WT and *graS::Tn* mutant  
 132 were each incubated for 16 h in RPMI 1640 only or RPMI 1640 supplemented with indicated  
 133 concentrations of colistin before determination of CFU counts prior to (0 h) and after (6 h) exposure  
 134 to 80 µg ml<sup>-1</sup> daptomycin (b). Graph in a represents the mean of three independent experiments and  
 135 error bars have been omitted for clarity. Graph in b represents the geometric mean ± geometric  
 136 standard deviation of three independent experiments. \*, P = 0.0001 (2.5 µg ml<sup>-1</sup>), < 0.0001 (5 µg ml<sup>-1</sup>),  
 137 < 0.0001 (10 µg ml<sup>-1</sup>), < 0.0001 (20 µg ml<sup>-1</sup>) determined by two-way ANOVA with Dunnett's *post-hoc*  
 138 test, RPMI 1640 and colistin compared to RPMI 1640 only. RFU, relative fluorescent units; OD<sub>600</sub>,  
 139 optical density at 600 nm. Source data are provided as a Source Data file.

140

141

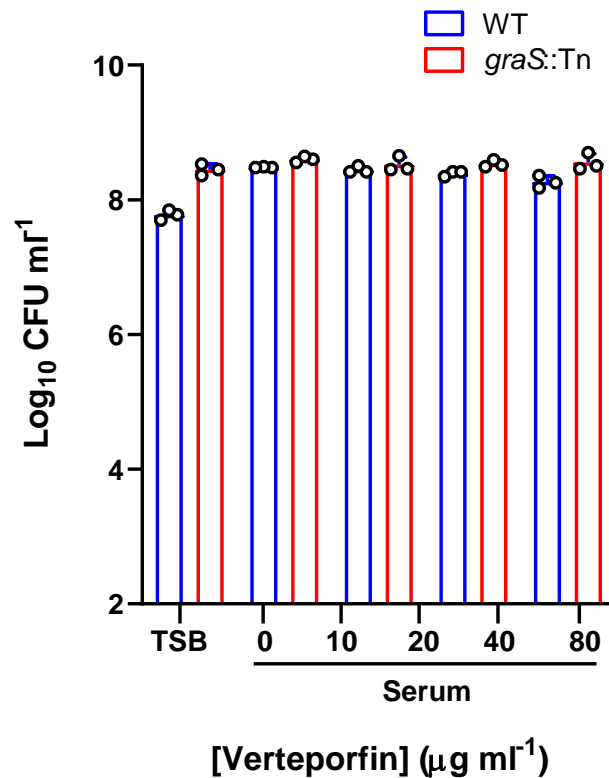

143

144 **Supplementary Fig. 7. Exposure of *S. aureus* to verteporfin does not affect bacterial survival in**  
 145 **serum.** Log<sub>10</sub> CFU ml<sup>-1</sup> of *S. aureus* JE2 WT grown in TSB or after 16 h incubation in human serum with  
 146 indicated concentrations of verteporfin. Data represent the geometric mean ± geometric standard  
 147 deviation of three independent experiments. Data were analysed by two-way ANOVA and no  
 148 statistically significant differences were observed between bacteria incubated in serum ± verteporfin  
 149 confirming that verteporfin does not compromise *S. aureus* survival in serum in the absence of  
 150 daptomycin. Source data are provided as a Source Data file.

151

152

153

154

155

156

157

158

159

160



161

162

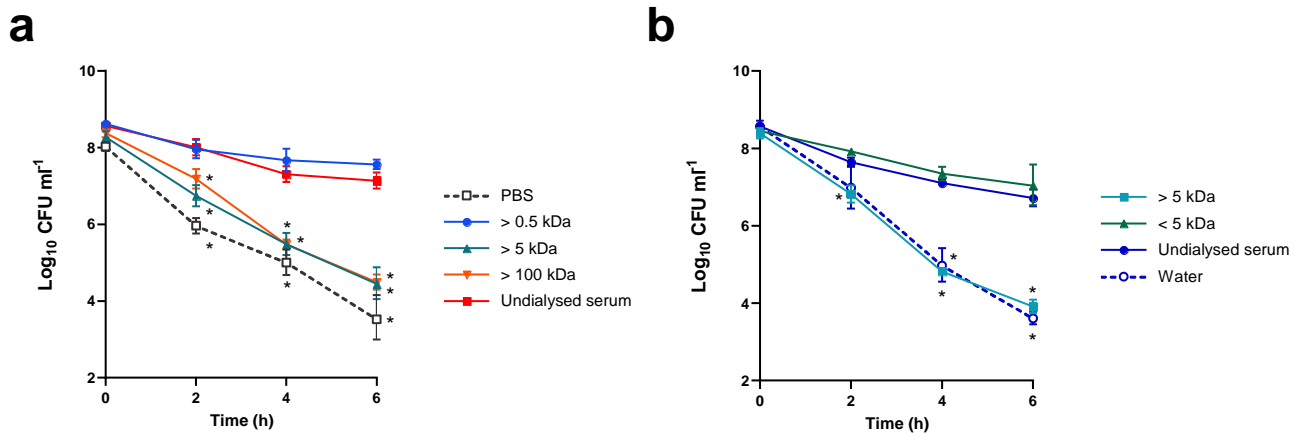

163

164 **Supplementary Fig. 8. A 0.5 – 5 kDa fraction of serum is necessary and sufficient to trigger**  
165 **daptomycin tolerance.** Serum was fractionated by dialysis against PBS using membranes with various  
166 molecular weight cut-offs. Next, CFU ml<sup>-1</sup> were determined for *S. aureus* JE2 WT which had been  
167 incubated for 16 h in serum fractions, or in PBS only or unfractionated serum, then exposed to 80 µg  
168 ml<sup>-1</sup> daptomycin in fresh human serum over 6 h (a). Log<sub>10</sub> CFU ml<sup>-1</sup> of *S. aureus* JE2 WT which had been  
169 incubated for 16 h in < 5 kDa or > 5 kDa serum fractions, or water only or undialysed serum, then  
170 exposed to 80 µg ml<sup>-1</sup> daptomycin in fresh human serum over 6 h (b). Graphs represent the geometric  
171 mean ± geometric standard deviation of three independent experiments and were analysed by two-  
172 way ANOVA with Dunnett's *post-hoc* test. (\* for a, P = 0.0373 (>100 kDa 2 h), 0.0016 (>100 kDa 4 h),  
173 0.0003 (>100 kDa 6 h), 0.0106 (>5 kDa 2 h), 0.0037 (>5 kDa 4 h), 0.0053 (>5 kDa 6 h), 0.0008 (PBS 2 h),  
174 0.0033 (PBS 4 h), 0.0121 (PBS 6 h). For b, P = 0.0233 (>5 kDa 2 h), 0.0009 (>5 kDa 4 h), 0.0002 (>5 kDa  
175 6 h), 0.0206 (Water 4 h), 0.0002 (Water 6 h) comparing undialysed serum vs serum  
176 fractions/PBS/water). Source data are provided as a Source Data file.

177

178

179

180

181

182

183

184

185

186

187

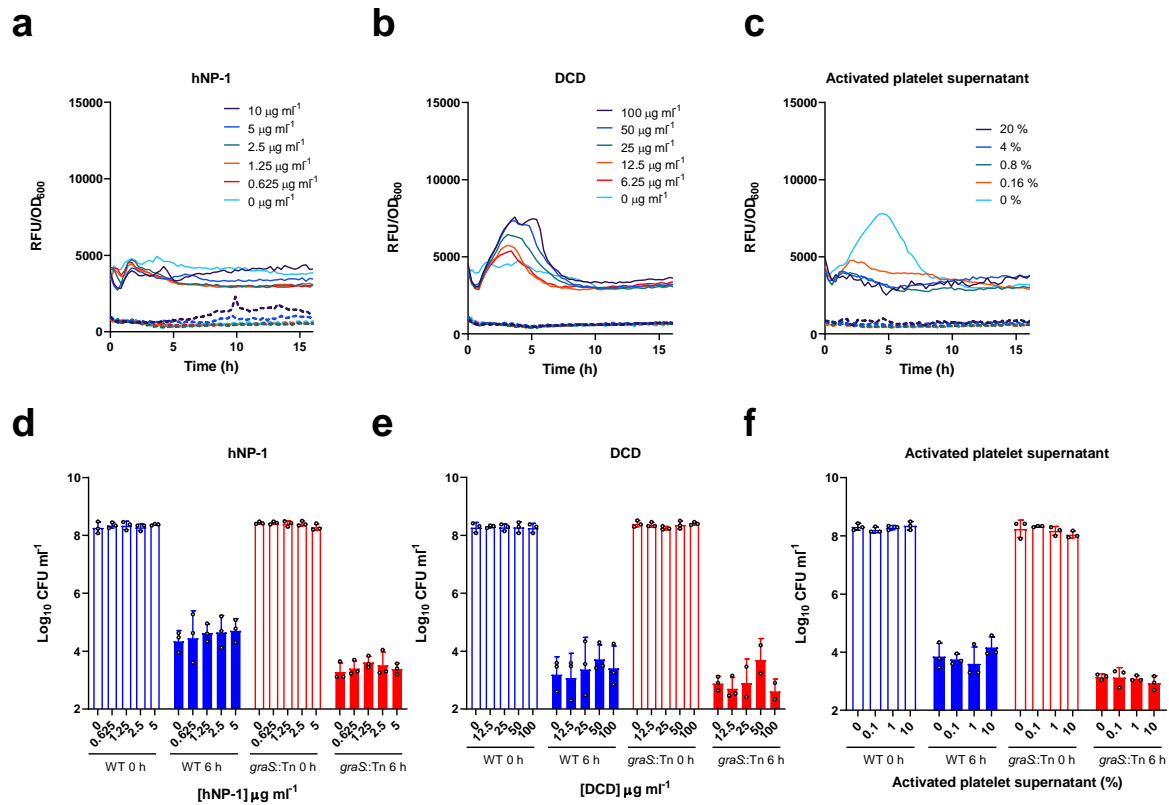

188

189 **Supplementary Fig. 9. Human neutrophil peptide-1, dermcidin and platelet AMPs do not activate**  
 190 **GraRS signalling or induce daptomycin tolerance.** TSB-grown cultures of *S. aureus* JE2 WT (solid lines)  
 191 and the *graS::Tn* mutant (dashed lines) containing *PdltA-gfp* were exposed to a range of  
 192 concentrations of hNP-1 (a), DCD (b) or activated platelet supernatant (c) in RPMI 1640 and GFP  
 193 fluorescence (RFU) and OD<sub>600</sub> were measured every 15 min for 16 h. Fluorescence values were divided  
 194 by OD<sub>600</sub> measurements to normalise for changes in cell density. *S. aureus* JE2 WT and *graS::Tn* mutant  
 195 were pre-incubated in RPMI 1640 containing hNP-1 (d), DCD (e) or activated platelet supernatant (f)  
 196 for 16 h before CFU ml<sup>-1</sup> were determine before (0 h) and after (6 h) exposure to 80 μg ml<sup>-1</sup>  
 197 daptomycin. Graphs in a – c represent the mean of at least two independent experiments with error  
 198 bars omitted for clarity. Graphs in d – f represent the geometric mean ± geometric standard deviation  
 199 of three independent experiments. Data in d – f were analysed by two-way ANOVA. No statistically  
 200 significant differences were observed (RPMI 1640 + AMPs compared to RPMI 1640 alone). Source data  
 201 are provided as a Source Data file.

202

203

204

205

206

207

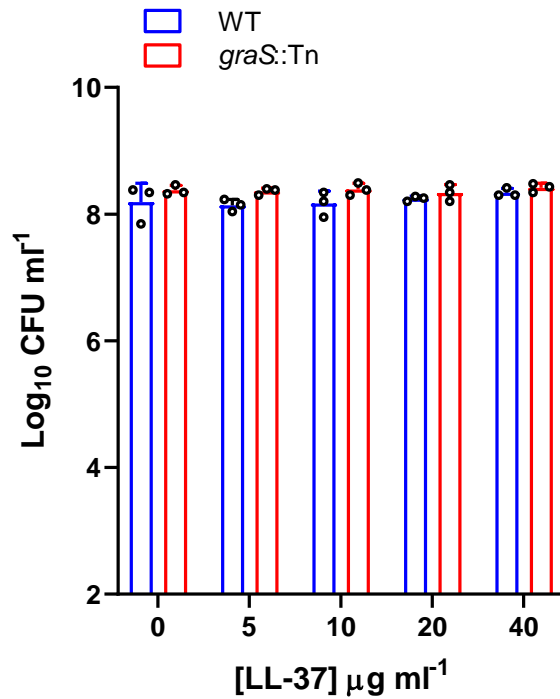

208

209 **Supplementary Fig. 10. Exposure of *S. aureus* to LL-37 does not affect bacterial survival.** Log<sub>10</sub> CFU  
 210 ml<sup>-1</sup> of *S. aureus* JE2 WT after 16 h incubation in RPMI 1640 with indicated concentrations of LL-37.  
 211 Data represent the geometric mean ± geometric standard deviation of three independent  
 212 experiments. Data were analysed by two-way ANOVA and no statistically significant differences were  
 213 observed (RPMI 1640 + LL-37 compared to RPMI 1640 alone). Source data are provided as a Source  
 214 Data file.

215

216

217

218

219

220

221

222

223

224

225

226

227

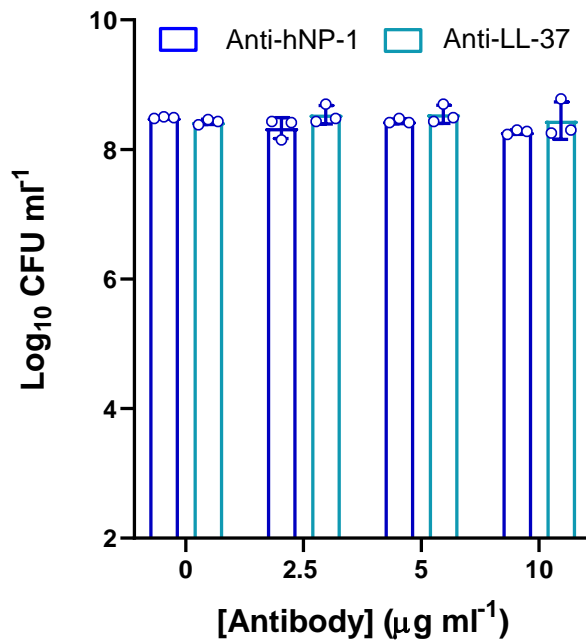

228

229 **Supplementary Fig. 11. Exposure of *S. aureus* to anti-hNP-1 or anti-LL-37 antibodies did not affect**  
230 **bacterial survival.** Log<sub>10</sub> CFU ml<sup>-1</sup> of *S. aureus* JE2 WT after incubation for 16 h in human serum  
231 supplemented with indicated concentrations of antibodies against hNP-1 or LL-37. Data represent the  
232 geometric mean ± geometric standard deviation of three independent experiments. Data were  
233 analysed by two-way ANOVA and no statistically significant differences were observed. Source data  
234 are provided as a Source Data file.

235

236

237

238

239

240

241

242

243

244

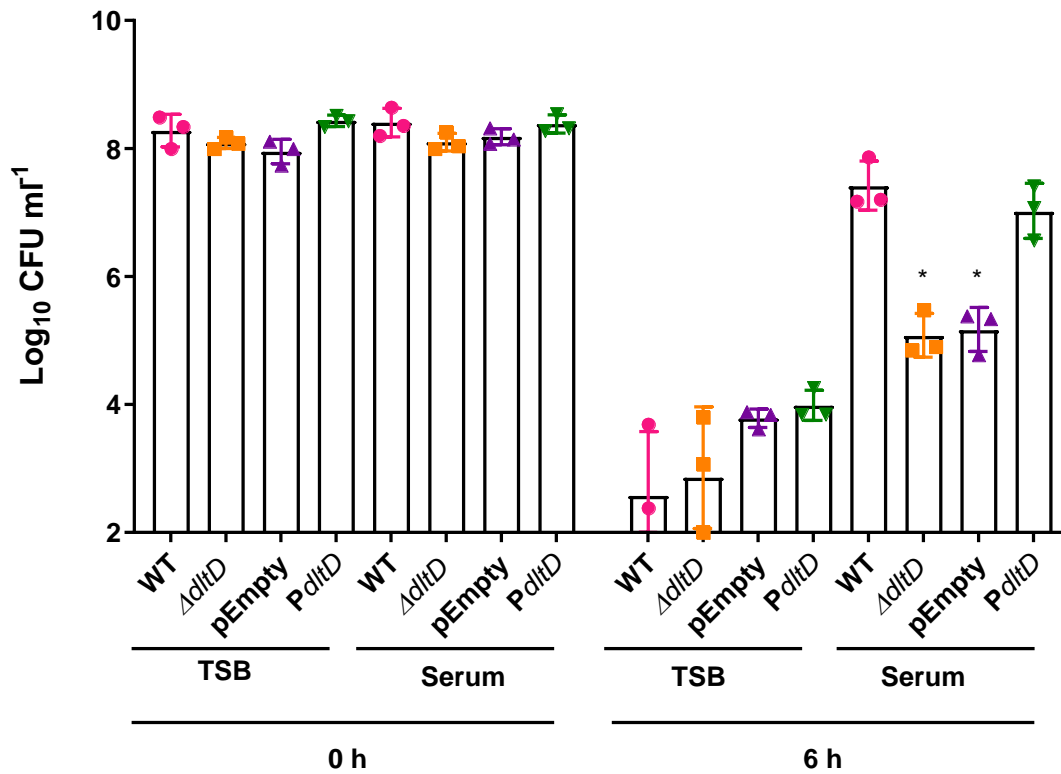

245

246 **Supplementary Fig. 12. Complementation of  $\Delta dltD$  mutant with WT  $dltD$  restores tolerance to WT**  
 247 **levels.** Log<sub>10</sub> CFU ml<sup>-1</sup> of TSB-grown and serum-adapted cultures of WT, the  $\Delta dltD$  mutant or  $\Delta dltD$   
 248 mutant complemented with either pCN34 or  $PdltD$  after a 16 h incubation in serum (0 h) and after  
 249 exposure to daptomycin in serum (6 h). Graph represents the geometric mean  $\pm$  geometric standard  
 250 deviation of three independent experiments (one data point fell below the limit of detection of 100  
 251 CFU ml<sup>-1</sup>). Data were analysed by two-way ANOVA with Dunnett's *post-hoc* test (\*  $P < 0.0001$  ( $\Delta dltD$   
 252 serum 6 h),  $< 0.0001$  (pEmpty serum 6 h) comparing serum-adapted WT with serum-adapted  
 253 mutants). Source data are provided as a Source Data file.

254

255

256

257

258

259

260

261

262

263

264

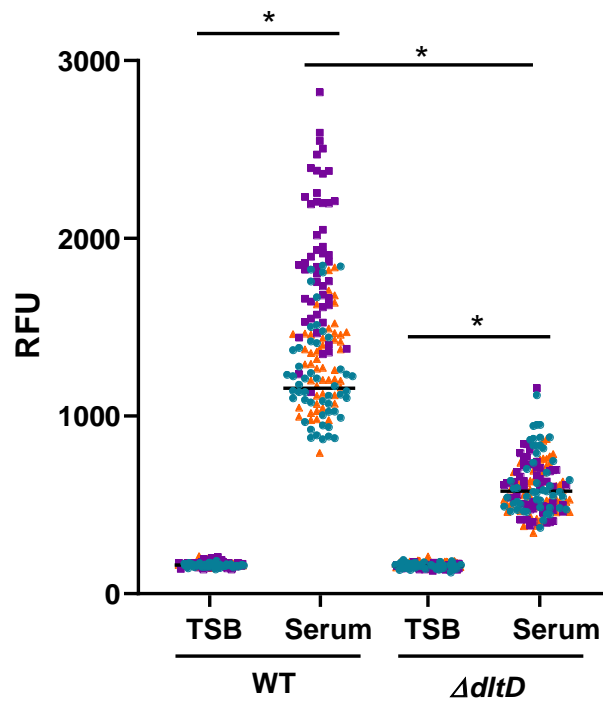

265

266 **Supplementary Fig. 13. The  $\Delta dltD$  mutant incorporates less HADA than WT during serum adaptation.**

267 The fluorescence of individual TSB-grown and serum-adapted WT and  $\Delta dltD$  cells was quantified.  
 268 Graph represents the fluorescence of 50 cells per biological replicate (150 cells in total) with the mean  
 269 of the three replicates indicated. Each biological replicate is depicted in a different colour. Data were  
 270 analysed by Kruskal Wallis test (\* P = < 0.0001 (WT TSB vs Serum), < 0.0001 (WT Serum vs  $\Delta dltD$   
 271 Serum), < 0.0001 ( $\Delta dltD$  TSB vs  $\Delta dltD$  Serum)). Source data are provided as a Source Data file.

272

273

274

275

276

277

278

279

280

281

282

283

284

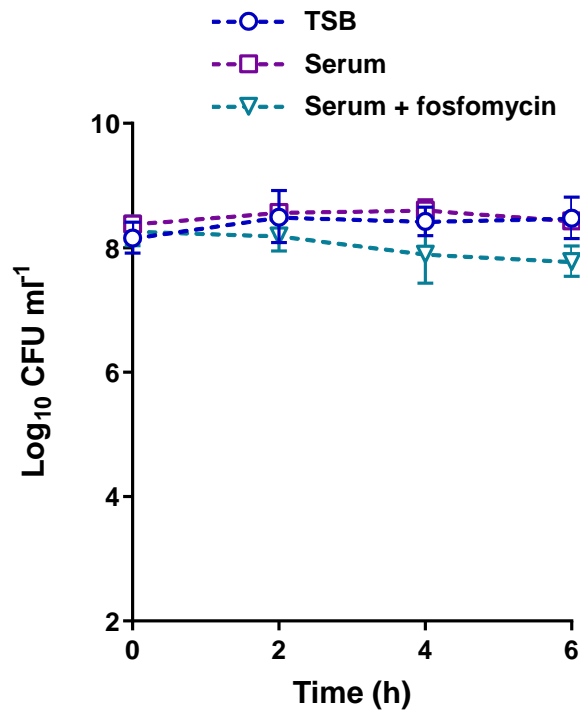

286

287

288 **Supplementary Fig. 14. Inhibition of peptidoglycan synthesis during serum adaptation did not affect**  
289 **bacterial viability.** Log<sub>10</sub> CFU ml<sup>-1</sup> over 6 h of TSB-grown *S. aureus* or cultures which had been  
290 incubated in serum supplemented, or not, with 64 μg ml<sup>-1</sup> fosfomycin for 16 h. Graph represents the  
291 geometric mean ± geometric standard deviation of three independent experiments. No statistically  
292 significant differences were observed (two-way ANOVA, log<sub>10</sub> CFU ml<sup>-1</sup> at each time-point vs 0 h).  
293 Source data are provided as a Source Data file.

294

295

296

297

298

299

300

301

302

303

304

305

306

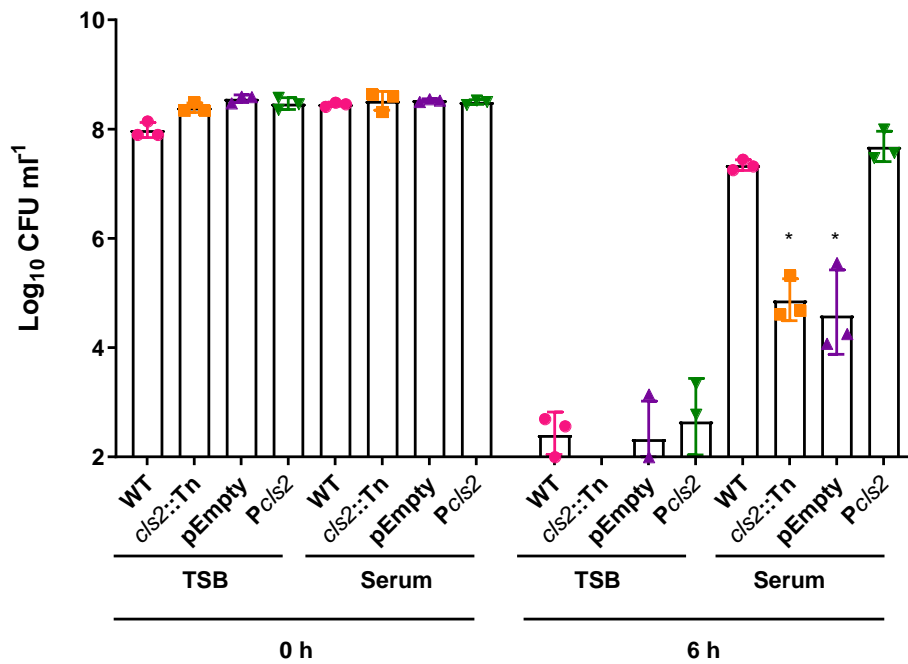

307

308

309 **Supplementary Fig. 15. Complementation of the *cls2*::Tn mutant restores daptomycin tolerance.**

310 Log<sub>10</sub> CFU ml<sup>-1</sup> of TSB-grown and serum-adapted cultures of *S. aureus* JE2 WT, *cls2*::Tn or *cls2*::Tn  
311 complemented with empty pCN34 or *Pcls2* before (0 h) or after (6 h) exposure to 80 μg ml<sup>-1</sup>  
312 daptomycin in serum. Graph represents the geometric mean ± geometric standard deviation of three  
313 independent experiments (some data points fell below the limit of detection of 100 CFU ml<sup>-1</sup>). Data  
314 were analysed by two-way ANOVA with Dunnett's *post-hoc* test (\* P < 0.0001 (*cls2*::Tn serum 6 h), <  
315 0.0001 (pEmpty serum 6 h) comparing serum-adapted WT with serum-adapted mutants). Source data  
316 are provided as a Source Data file.
